# Supplementary material for: Enhanced autophagy contributes to protective effects of IL-22 against acetaminophen-induced liver injury
Source: PubMed Central journal article supplement — Theranostics. 2018 Jul 30;8(15):4170–80. doi: 10.7150/thno.25798 (PMC6096391; doi:10.7150/thno.25798), 2018-07-30
Supplement: thnov08p4170s1.pdf [file thnov08p4170s1.pdf]

1 **Supporting Information**

2 **Enhanced autophagy contributes to protective effects**  
3 **of IL-22 against acetaminophen-induced liver injury**

4 Ruidong Mo<sup>1,2#</sup>, Rongtao Lai<sup>1,2#</sup>, Jie Lu<sup>1,2#</sup>, Yan Zhuang<sup>1</sup>, Tianhui Zhou<sup>1,2</sup>, Shaowen  
5 Jiang<sup>1,2</sup>, Peipei Ren<sup>1,2</sup>, Ziqiang Li<sup>1,2</sup>, Zhujun Cao<sup>1,2</sup>, Yuhao Liu<sup>1,2</sup>, Lichang Chen<sup>1,2</sup>,  
6 Lifu Xiong<sup>1,2</sup>, Peng Wang<sup>1,2</sup>, Hui Wang<sup>1</sup>, Wei Cai<sup>1</sup>, Xiaogang Xiang<sup>1,2\*</sup>, Shisan Bao<sup>3\*</sup>,  
7 Qing Xie<sup>1,2\*</sup>

8 <sup>1</sup>Department of Infectious Diseases, <sup>2</sup>Translational Lab of Liver Diseases, Ruijin  
9 Hospital, Shanghai Jiao Tong University School of Medicine, Shanghai, China

10 <sup>3</sup>Discipline of Pathology, School of Medical Sciences and Bosch Institute, Charles  
11 Perkins Centre, The University of Sydney, New South Wales 2006, Australia

12 #These authors contributed equally to this work.

13 \*Address correspondence to Qing Xie, [xieqingrjh@163.com](mailto:xieqingrjh@163.com), Shisan Bao,  
14 bob.bao@sydney.edu.au, or Xiaogang Xiang, shine-xxg@163.com

15 **Table of contents**

16 Supplementary materials and methods.....3  
17 Supplementary Table 1.....9  
18 Supplementary Figure 1.....10  
19 Supplementary Figure 2.....11  
20 Supplementary Figure 3.....12  
21 Supplementary Figure 4.....13

|   |                             |    |
|---|-----------------------------|----|
| 1 | Supplementary Figure 5..... | 13 |
| 2 | Supplementary Figure 6..... | 14 |
| 3 | Supplementary Figure 7..... | 15 |
| 4 | Supplementary Figure 8..... | 15 |
| 5 | Supplementary Figure 9..... | 16 |
| 6 | SupplementaryFigure10.....  | 16 |
| 7 | Reference.....              | 17 |
| 8 |                             |    |

1 **Supplementary materials and methods**

2 **Reagents**

3 APAP and chloroquine were purchased from Sigma-Aldrich (St. Louis, MO, USA).  
4 Dorsomorphin (compound C) was purchased from Selleck Chemicals (Houston, TX,  
5 USA).

6 **Biochemical and histological assessment**

7 Serum alanine aminotransferase (ALT) and aspartate aminotransferase (AST)  
8 activities were determined as described previously [1]. Liver tissues were fixed in 4%  
9 paraformaldehyde, then embedded in paraffin, and sectioned at 5  $\mu\text{m}$  for H&E  
10 staining. The necrotic areas in liver tissue were quantified by Image J 1.50 software  
11 [2].

12 **Measurement of hepatic reactive oxygen species (ROS)**

13 The collected liver tissues were immediately embedded in tissue-freezing medium  
14 (O.C.T compound, Tissue-Tek, CA, USA) and stored at  $-80^{\circ}\text{C}$ . Frozen sections were  
15 cut at 8  $\mu\text{m}$  thickness on a Leica CM1900 cryotome. Hepatic ROS was detected using  
16 CM-H<sub>2</sub>DCFDA (Genmed Scientific Inc, USA). The images of the sections were  
17 captured on a Leica DM 4000B LED photomicroscope with fluorescent microscopy  
18 (490nm excitation, 520 nm emission).

19 **TUNEL staining**

1 The frozen sections were labeled for TUNEL staining [3], according to the instruction  
2 from the manufacturer (Roche, Switzerland).

### 3 **Inflammatory cytokines quantification in serum**

4 Serum levels of IL-6 and TNF were determined using cytokine bead array (CBA, BD  
5 Biosciences, MA, USA) [4]. Serum levels of IL-22 were measured using ELISA kit  
6 (R&D, M2200, MN, USA) [5] following the instruction from the manufacturer.

### 7 **Quantitative Real-Time PCR (qRT-PCR) and RT<sup>2</sup> Profiler PCR Array**

8 Total RNA was extracted from mice liver tissues with Trizol (Invitrogen, Carlsbad,  
9 CA), as previously described [6]. The PCR array of oxidative stress, inflammatory  
10 and autophagy related genes transcript expression was determined by RT<sup>2</sup> Profiler  
11 PCR Array (MS-PA-cus-118, BioTNT Biosciences Inc., Shanghai, China) [7]. cDNA  
12 was synthesized using oligo (dT) primers (Takara, Dalian, China), qRT-PCR was  
13 performed on the ABI ViiA7 (Applied Bio systems, Foster, CA) following the  
14 manufacturer's instructions. The primers listed in **Supplementary Table 1** were  
15 purchased from Sangon Biotech Co., Ltd (Shanghai, China). Relative mRNA levels  
16 were normalized to GAPDH, the expression differences were determined by the  $2^{-\Delta\Delta}$   
17 CT method. Each lysate was performed three times and each time in triplicates.

### 18 **Transmission electron microscopy (TEM)**

19 Liver tissues were fixed with 2.5% glutaraldehyde in phosphate buffer, washed and

1 fixed in 1% OsO<sub>4</sub>, then dehydrated through graded ethanol solutions and embedded  
2 in Spurr resin. The sections (70 nm) were counterstained with uranyl acetate and lead  
3 citrate. Electron microscopy was performed by TEM (Philips, CM120) [8].

#### 4 **Immunohistochemistry**

5 Immunohistochemistry was performed as previously described [9]. The liver sections  
6 were labeled with rabbit anti mouse LC3 antibody (Abgent, San Diego, CA, USA,  
7 1:50), Ki-67 (Abcam, Cambridge, MA, USA, 1:50) or PCNA antibody (Abcam,  
8 Cambridge, MA, USA, 1:800) followed by secondary antibody (Peroxidase  
9 AffiniPure Goat Anti-Rabbit IgG (H+L), Jackson ImmunoResearch, PA, USA)  
10 according to the manufacturer's instructions. The labeled sections were examined  
11 under the Leica DM 4000B LED photomicroscope.

#### 12 **Cell culture and transfection using GFP-LC3**

13 Human non-tumor hepatic L02 cells, obtained from Type Culture Collection of  
14 Chinese Academy of Sciences (Shanghai, China) [10], were cultured in RPMI 1640  
15 supplemented with 10% [v/v] fetal bovine serum, 2mM glutamine at 37°C with 95%  
16 air and 5% CO<sub>2</sub>.

17 Green fluorescent protein and LC3 (GFP-LC3) fusion protein is a reliable indicator of  
18 autophagy initiation by the examination of LC3 puncta or dots [11]. L02 cells were  
19 transfected with pBABE-puro mCherry-EGFP-LC3B (Addgene plasmid # 22418, a  
20 gift from Dr. Zhiqun Song, Shanghai Jiao Tong University) [12], the transfection was

1 performed by lipofectamine 3000 (Life Technologies, CA, USA). GFP-LC3  
2 expressing L02 cells were exposed to different treatment, then cellular fluorescent  
3 levels were measured to reflect autophagy activity. The transfected L02 cells were  
4 treated with IL-22 (400 ng/ml) for 1 hour [13], followed by treatment with APAP (5  
5 mM) for 6 hours, then the cellular GFP-LC3 dots was evaluated, using a Zeiss  
6 fluorescence microscope (LSM 710).

### 7 **Isolation and culture of primary mouse hepatocytes**

8 Primary hepatocytes were isolated from the mice as previously described [14]. Briefly,  
9 C57BL/6J male mice were anesthetized with 10% chloral hydrate, and the livers were  
10 perfused with collagenase (Gibco, MA, USA) (0.05% in Hank's solution) through  
11 portal vein [14]. The perfused liver was transferred into collagenase solution to  
12 further release the dispersed cells for 10 min in the plate. The suspension was filtered  
13 through a 100  $\mu$ m membrane and washed three times. Hepatocytes pellets were  
14 suspended in hepatocyte medium (Sciencecell, 5201, CA, USA) containing 10% fetal  
15 bovine serum (Gibco, MA, USA) after aspiration of the supernatant. Then hepatocytes  
16 were seeded onto type I collagen-coated dish ( $4 \times 10^4$  cells/cm<sup>2</sup>) in hepatocyte medium.

### 17 **Cell viability assay**

18 Cell viabilities were determined using 3-(4,5-dimethylthiazol-2-yl)-2,  
19 5-diphenyltetrazolium bromide (MTT) assay kit (Beyotime, Nantong, China). L02  
20 cells were treated with IL-22 (400 ng/ml) for 1 hours, then APAP (5 mM) for 24 hours.

1 MTT solutions was added into the plates and allowed to incubate for 4 hours. The  
2 formazan in cells was dissolved in 10% SDS-5% iso-butanol-0.01M HCL, the  
3 absorbance was measured at 570 nm.

#### 4 **Assessment of lactate dehydrogenase (LDH) activity**

5 LDH released in the culture medium can reflect the amount of cells death [15]. The  
6 levels of LDH were detected using a commercial kit (Beyotime, Nantong, China).

#### 7 **Western blot analysis**

8 Briefly, extracted total proteins were quantified using bicinchoninic acid method. The  
9 following primary antibodies were used in western blot: p-JNK (Thr183/Thr185) (Cat.  
10 No 4668), JNK (Cat. No 9252), p-AMPK (Thr172) (Cat. No 4188), AMPK (Cat. No  
11 2603), p-STAT3 (Tyr705) (Cat. No 9145), STAT3 (Cat. No 4904), SQSTM1/p62 (Cat.  
12 No 5114) (Cell Signaling Technology Inc. Danvers, MA, USA), LC3 (L7543,  
13 Sigma-Aldrich, St. Louis, MO, USA), GAPDH (AG019, Beyotime, Nantong, China).  
14 Goat anti-rabbit IgG-HRP (Cell Signaling Technology, MA, USA) and goat  
15 anti-mouse IgG-HRP (Beyotime, Nantong, China) were used as secondary antibodies.  
16 The proteins were detected using ECL detection reagent (New Cell & Molecular  
17 Biotech, Shanghai, China).

#### 18 **Statistical analysis**

19 Statistical analyses were performed, using the Graph Prism 6.01 (San Diego, CA,

1 USA). Data were expressed as mean  $\pm$  SEM. Comparisons between two groups were  
2 performed using unpaired t test or the Mann-Whitney U test, among three groups  
3 using ANOVA test or Kruskal-Wallis test where appropriate. *P* value less than 0.05  
4 was considered statistically significant.

5



1 **Supplementary Table 1**

2 **Supplementary Table 1. The mouse primer sequences for Real-Time quantitative**  
3 **PCR**

| Primer Name  |                | Primer Sequences (5'-3')  |
|--------------|----------------|---------------------------|
| GAPDH        | Forward primer | AGGTCGGTGTGAACGGATTTG     |
|              | Reverse primer | TGTAGACCATGTAGTTGAGGTCA   |
| IL-6         | Forward primer | CACATGTTCTCTGGGAAATCGTGGA |
|              | Reverse primer | TCTCTCTGAAGGACTCTGGCTTTGT |
| TNF          | Forward primer | CCCTCACACTCAGATCATCTTCT   |
|              | Reverse primer | GCTACGACGTGGGCTACAG       |
| IL-1 $\beta$ | Forward primer | GCAACTGTTCCCTGAACTCAACT   |
|              | Reverse primer | ATCTTTTGGGGTCCGTCAACT     |
| p62          | Forward primer | AGAATGTGGGGGAGAGTGTG      |
|              | Reverse primer | TCTGGGGTAGTGGGTGTCAG      |
| IL-22        | Forward primer | GCTGCCTGCTTCTCATTGC       |
|              | Reverse primer | AAGGTGCGGTTGACGATGTA      |

4

5

1 **Supplementary Figures**

2

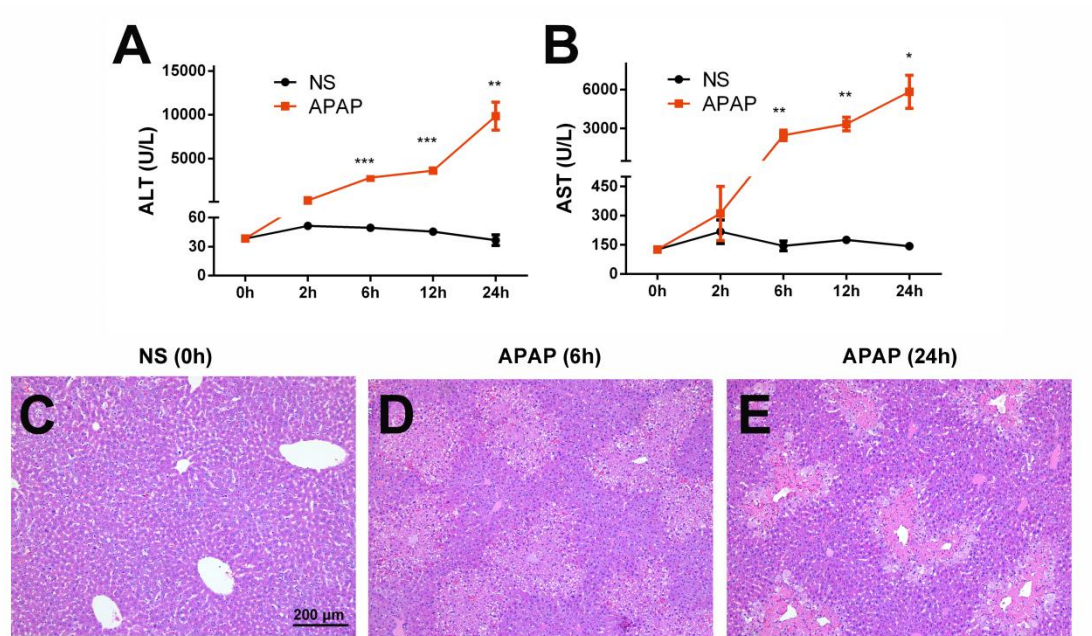

3

4 **Supplementary Figure 1. Acetaminophen overdose-induced liver injury in mice.**

5 (A, B) Serum ALT and AST in mice were measured at various time points post-APAP  
6 challenged. (C, D, E) Representative images of mice liver H&E sections at 6 and 24 h  
7 after APAP treatment (original magnification 100×). Data are presented as means ±  
8 SEM,  $p$  value was calculated by Mann-Whitney test in A and B,  $*p < 0.05$ ,  $**p < 0.01$   
9 and  $***p < 0.001$ .

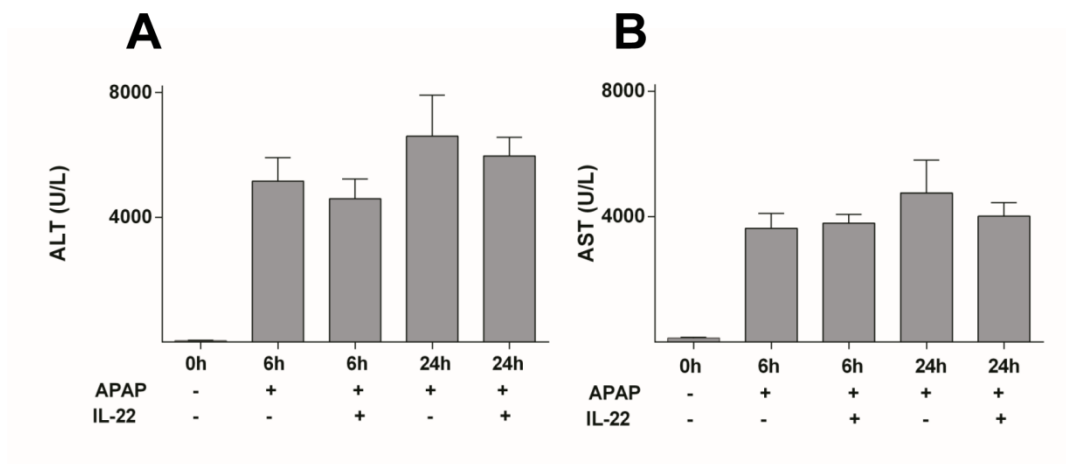

1

2 **Supplementary Figure 2. Therapeutic IL-22 administration did not significantly**  
 3 **alleviate liver injury induced by APAP.**

4 (A, B) Serum ALT and AST from normal control, APAP-challenged and therapeutic  
 5 IL-22 administration (2 h after APAP challenged) mice at 6 h and 24 h. Data are  
 6 expressed as mean  $\pm$ SEM.

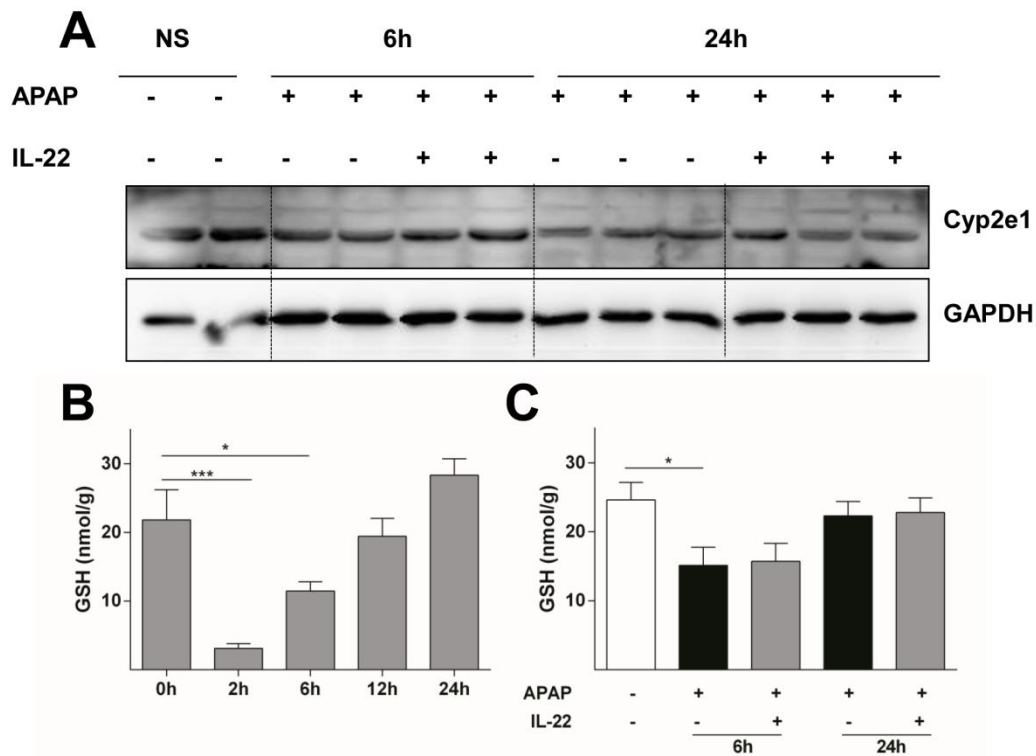

1

2 **Supplementary Figure 3. IL-22 pretreatment did not alter hepatic APAP**  
3 **metabolism in mice challenged with APAP.**

4 (A) Immunoblot analysis of hepatic CYP2E1 expression in the control (saline), APAP  
5 (400 mg/kg) and IL-22 plus APAP treated group were presented. (B) Total hepatic  
6 glutathione was measured at baseline and the different time points post-APAP  
7 intoxication, (C) as well as from control, APAP-challenged and IL-22 plus APAP  
8 treated mice at 6 h and 24 h post-APAP administration. A comparable glutathione  
9 (GSH) depletion was observed between APAP (400 mg/kg) treatment and IL-22 plus  
10 APAP treatment group. Data are expressed as mean  $\pm$  SEM,  $p$  value was calculated by  
11 un-paired Student's  $t$  test in B and C,  $*p < 0.05$ ,  $***p < 0.001$ .

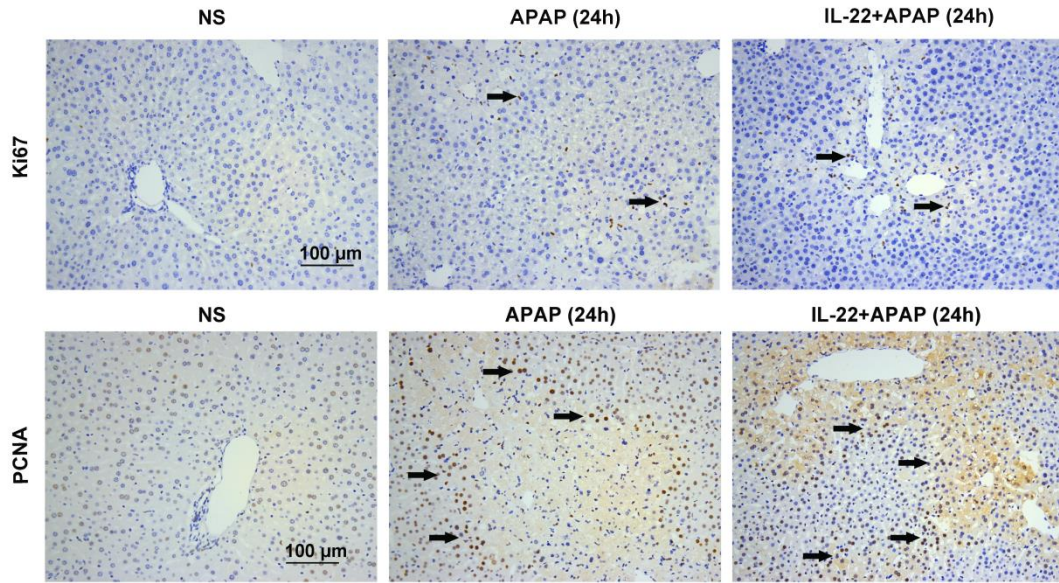

1

2 **Supplementary Figure 4. Ki-67 and PCNA expression in mice liver tissues.**

3 Representative liver sections images of Ki-67 and PCNA staining from normal control  
 4 (saline), APAP (400 mg/kg), IL-22 (1 mg/kg) plus APAP (400 mg/kg) treated mice at  
 5 24 h after APAP challenged.

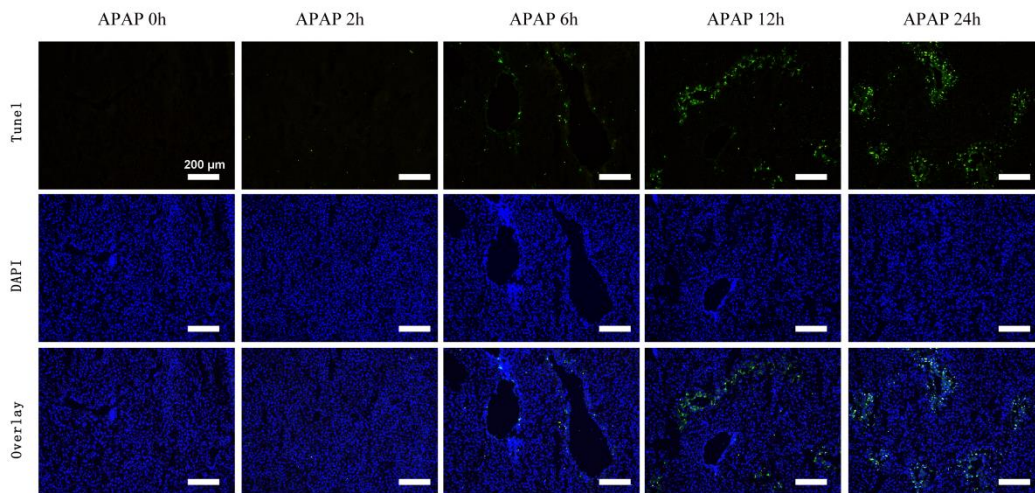

6

7 **Supplementary Figure 5 Mice liver tissues were subjected to TUNEL staining**  
 8 **post-APAP challenged**

1 Hepatic TUNEL staining was performed at various time points after mice challenged  
2 with APAP, nuclei were counterstained with DAPI (original magnification 100×).

3

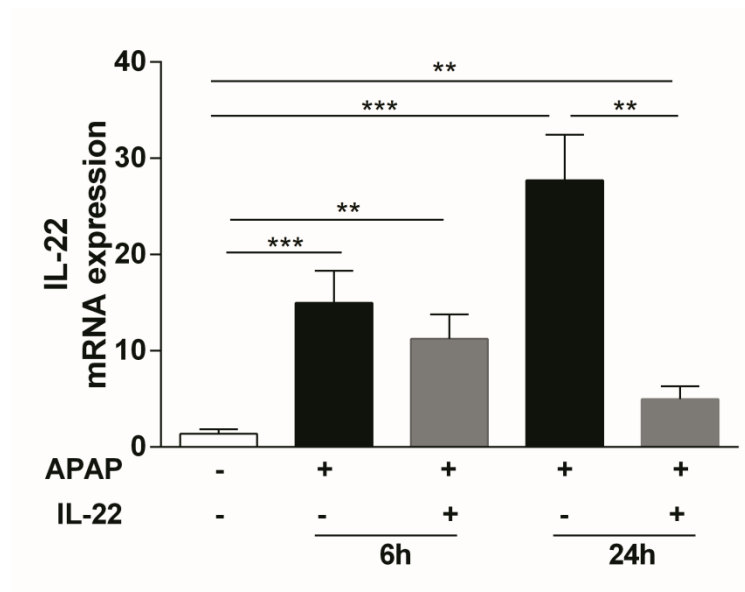

4

5 **Supplementary Figure 6. Hepatic IL-22 mRNA expression in mice from three**  
6 **experimental groups as indicated.**

7 Hepatic IL-22 mRNA expression was detected in normal control, APAP-challenged  
8 and IL-22 plus APAP treated mice at 6 h and 24 h. Data are presented as means  $\pm$   
9 SEM,  $p$  value was calculated by Kruskal-Wallis test, \*\*  $p < 0.01$  and \*\*\*  $p < 0.001$ .

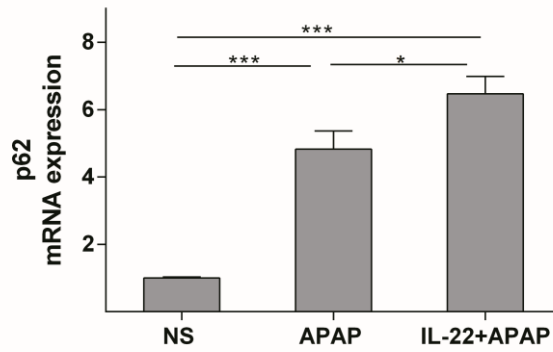

1

2 **Supplementary Figure 7. IL-22 pretreatment increases hepatic p62 mRNA**  
 3 **expression.**

4 Hepatic p62 mRNA expression was detected from three experimental groups at 24 h  
 5 after APAP challenged. Data are presented as means  $\pm$  SEM, *p* value was calculated  
 6 by Kruskal-Wallis test, \**p* < 0.05, \*\*\* *p* < 0.001.

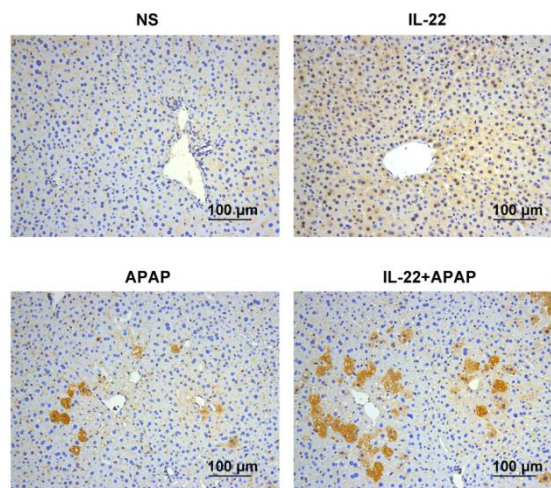

7

8 **Supplementary Figure 8. Cleaved LC3 expression in mice liver tissues.**

9 Representative liver sections images of cleaved LC3 staining from normal control  
 10 (saline), IL-22 (1 mg/kg), APAP (400 mg/kg), IL-22 (1 mg/kg) plus APAP (400 mg/kg)

1 treatment mice at 6 h after APAP challenged.

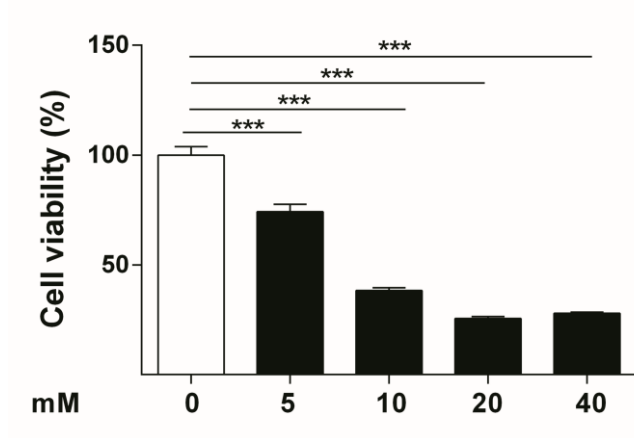

2

3 **Supplementary Figure 9. APAP exhibits concentration-dependent inhibition of**  
4 **cell viability of L02 cells.**

5 The cell viability of L02 cells was measured after treatment with 5-40 mM of APAP  
6 for 24 h. Data are presented as means  $\pm$  SEM, *p* value was calculated by  
7 Kruskal-Wallis test, \*\*\* *p* < 0.001.

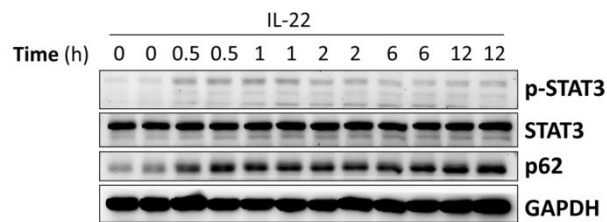

8

9 **Supplementary Figure 10. IL-22 up-regulates p-STAT3, p62 protein expression**  
10 **in L02 cells.**

11 L02 cells were treated with IL-22 (400 ng/ml) for various periods as indicated,  
12 western blot analysis showing p-STAT3, STAT3, p62 expression in L02 cells.

13



## 1 Reference

- 2 1. An F, Gong B, Wang H, Yu D, Zhao G, Lin L, Tang W, et al. miR-15b and miR-16 regulate TNF  
3 mediated hepatocyte apoptosis via BCL2 in acute liver failure. *Apoptosis*. 2012; 17: 702-16.
- 4 2. Scheiermann P, Bachmann M, Goren I, Zwissler B, Pfeilschifter J, Muhl H. Application of  
5 interleukin-22 mediates protection in experimental acetaminophen-induced acute liver injury. *Am*  
6 *J Pathol*. 2013;182:1107-1113.
- 7 3. Ni HM, Boggess N, McGill MR, Lebofsky M, Borude P, Apte U, Jaeschke H, et al. Liver-specific  
8 loss of Atg5 causes persistent activation of Nrf2 and protects against acetaminophen-induced liver  
9 injury. *Toxicol Sci*. 2012;127:438-450.
- 10 4. Lundback P, Lea JD, Sowinska A, Ottosson L, Furst CM, Steen J, Aulin C, et al. A novel high  
11 mobility group box 1 neutralizing chimeric antibody attenuates drug-induced liver injury and  
12 postinjury inflammation in mice. *Hepatology*. 2016;64:1699-1710.
- 13 5. Lu Z, Liu J, Liu X, Huang E, Yang J, Qian J, Zhang D, et al. MiR-15a/16-1 Suppresses  
14 AHR-dependent IL-22 Secretion in CD4(+) T cells and Contributes to Immune-mediated Organ  
15 Injury. *Hepatology*. 2018; 67: 1027-40.
- 16 6. Mo R, Wang P, Lai R, Li F, Liu Y, Jiang S, Zhao G, et al. Persistently elevated circulating Th22  
17 reversely correlates with prognosis in HBV-related acute-on-chronic liver failure. *J Gastroenterol*  
18 *Hepatol*. 2017;32:677-686.
- 19 7. Liu L, Xue Y, Zhu Y, Xuan D, Yang X, Liang M, Wang J, et al. Interleukin 37 limits monosodium  
20 urate crystal-induced innate immune responses in human and murine models of gout. *Arthritis Res.*  
21 *Ther* 2016;18:268.
- 22 8. Ni HM, Bockus A, Boggess N, Jaeschke H, Ding WX. Activation of autophagy protects against  
23 acetaminophen-induced hepatotoxicity. *Hepatology* 2012;55:222-232.
- 24 9. Lai R, Xiang X, Mo R, Bao R, Wang P, Guo S, Zhao G, et al. Protective effect of Th22 cells and  
25 intrahepatic IL-22 in drug induced hepatocellular injury. *J Hepatol*. 2015;63:148-155.
- 26 10. Ahmed MM, Wang T, Luo Y, Ye S, Wu Q, Guo Z, Roebuck BD, et al. Aldo-keto reductase-7A  
27 protects liver cells and tissues from acetaminophen-induced oxidative stress and hepatotoxicity.  
28 *Hepatology*. 2011;54:1322-1332.
- 29 11. Whelan KA, Merves JF, Giroux V, Tanaka K, Guo A, Chandramouleeswaran PM, Benitez AJ, et al.  
30 Autophagy mediates epithelial cytoprotection in eosinophilic oesophagitis. *Gut*. 2017; 66:  
31 1197-207.
- 32 12. N'Diaye EN, Kajihara KK, Hsieh I, Morisaki H, Debnath J, Brown EJ. PLIC proteins or ubiquilins  
33 regulate autophagy-dependent cell survival during nutrient starvation. *EMBO Rep*.  
34 2009;10:173-179.
- 35 13. Wang L, Zhang S, Cheng H, Lv H, Cheng G, Ci X. Nrf2-mediated liver protection by  
36 esculetoside A against acetaminophen toxicity through the AMPK/Akt/GSK3beta pathway. *Free*  
37 *Radic Biol Med*. 2016;101:401-412.
- 38 14. Wang F, Zhang X, Wang J, Chen M, Fan N, Ma Q, Liu R, et al. LGR4 acts as a link between the  
39 peripheral circadian clock and lipid metabolism in liver. *J Mol Endocrinol*. 2014;52:133-143.
- 40 15. Furuta K, Yoshida Y, Ogura S, Kurahashi T, Kizu T, Maeda S, Egawa M, et al. Gab1 adaptor  
41 protein acts as a gatekeeper to balance hepatocyte death and proliferation during  
42 acetaminophen-induced liver injury in mice. *Hepatology*. 2016;63:1340-1355.
